# Supplementary material for: Exercise training in the treatment of paroxysmal atrial fibrillation: study protocol of the Cologne ExAfib Trial
Source: PubMed Central journal article supplement — BMJ Open. 2020 Oct 31;10(10):e040054. doi: 10.1136/bmjopen-2020-040054 (PMC7783621; doi:10.1136/bmjopen-2020-040054), 2020-10-31
Supplement: bmjopen-2020-040054supp001.pdf [file bmjopen-2020-040054supp001.pdf]

## **Patienteninformation zur Studie**

„Vorhofflimmern und Sport.“

Name \_\_\_\_\_ Geburtsdatum \_\_\_\_\_

An der Deutschen Sporthochschule Köln wird im Institut für Kreislaufforschung und Sportmedizin eine Studie vorbereitet, welche den Einfluss von körperlicher Belastung in Form von Ausdauertraining, Intervalltraining und Krafttraining auf Patienten mit Vorhofflimmern untersucht. Hintergrund der Studie ist die Beobachtung, dass Vorhofflimmern in der Bevölkerung immer mehr zunimmt und dass sportliche Interventionen bisher positive Effekte auf Häufigkeit und Intensität der Vorhofflimmerepisoden zeigen konnten. Die gewonnenen Ergebnisse aus der Studie sollen mit dazu beitragen, neue Konzepte für die Therapie des Vorhofflimmerns zu entwickeln.

### **Studieninhalte**

Im Rahmen der Studie wird ein 12-wöchiges Trainingsprogramm à 2 Trainingseinheiten pro Woche durchgeführt. Vor und nach dem 12-Wochen-Zeitraum werden medizinische Untersuchungen und Testungen zu Ausdauer und Kraft durchgeführt. Ein Viertel der Teilnehmer wird der Kontrollgruppe zugelost, die kein Training durchführt. Dies ist wichtig, um die Effekte des Trainings vergleichen zu können. Nachdem der 12-wöchige Interventionszeitraum abgeschlossen ist, wird auch den Patientend er Kontrollgruppe das gleiche Sportprogramm angeboten, das die anderen Gruppen durchliefen, um auch von den (mutmaßlich) positiven Aspekten zu profitieren.

### **Untersuchung**

An der Studie können Menschen im Alter zwischen 50 und 80 Jahren mit anfallsartigem (paroxysmalem) Vorhofflimmern teilnehmen.

Alle Untersuchungen finden in der Deutschen Sporthochschule Köln, Institut für Kreislaufforschung und Sportmedizin, statt (NawiMedi, 1. Stock).

Im Rahmen einer Voruntersuchung werden Sie über den Inhalt, den Ablauf und mögliche Risiken der Studie aufgeklärt. Es werden Ihnen formale Dokumente ausgeteilt, Sie füllen einen Fragebogen aus und unterschreiben die Einverständniserklärung. Des Weiteren vereinbaren wir nach Einschluss in die Studie die weiteren Termine für die nächsten Untersuchungen.

**Hauptuntersuchung** (Durchführung einmal vor der Trainingsintervention und einmal nach der Trainingsintervention)

Es werden folgende Untersuchungen durchgeführt:

- Anthropometrische Daten:
  - Körpergewicht, Körpergröße, Körperzusammensetzung, Bauchumfang

- Ruhe-EKG
- Ruhe Blutdruckmessung
- Arteriographie
- Herzfrequenzvariabilitätsmessung
- Blutabnahme (nüchtern)
- Echokardiografie
- Ultraschall der Beinmuskulatur
- Spiroergometrie mit Laktatmessung auf dem Fahrradergometer
- 24-Stunden-Blutdruckmessung und -EKG

### **Training**

Das Training findet in den Räumlichkeiten der Deutschen Sporthochschule statt (NawiMedi, 1. Stock, Trainingsraum).

Die TeilnehmerInnen werden in vier Gruppen zufällig eingeteilt (**randomisiert**).

Gruppe A: submaximales Krafttraining

Gruppe B: moderates Ausdauertraining

Gruppe C: intensives Intervall-Ausdauertraining (HIIT)

Gruppe D: Kontrollgruppe (kein Training)

Die Trainingseinheiten werden unter Anleitung und kontinuierlicher Betreuung durchgeführt.

Das Gruppentraining findet 2x wöchentlich à 60 Minuten statt.

Die Trainingseinheiten sind auf Ihre individuelle Leistungsfähigkeit zugeschnitten. Die individuelle Belastungsintensität wird aus dem Fahrradbelastungstest und durch standardisierte Krafttestungen am Gerät ermittelt.

Nach dem Ende der Trainingsintervention und absolvierter Untersuchung ist die empirische Phase der Studie beendet.

Es fallen bei Teilnahme an der Studie für Sie keinerlei Kosten an. Die Anfahrt zu den Untersuchungen und Trainingseinheiten müssen Sie jedoch selber tragen. Es werden keine Reisekosten erstattet.

### **Mögliche gesundheitliche Risiken**

Zur Vermeidung eines erhöhten Risikos bei einer Teilnahme an körperlichen Belastungstests und sportlichem Training, werden mögliche gesundheitliche Risiken mittels Fragebogen, Untersuchung und eines Belastungstests des Herz-Kreislauf-Systems unter ärztlicher Aufsicht beurteilt.

Die TeilnehmerInnen werden während des Trainings von ausgebildeten Fachkräften betreut.

Trotzdem können natürlich bei intensiver oder ungewohnter Belastung Beschwerden auftreten (z.B. Muskelkater durch Krafttraining, Bluthochdruck durch Belastung, etc.). Die Wahrscheinlichkeit für Komplikationen ist sehr gering. Das erfahrene Team aus Sportwissenschaftlern und Sportmedizinern wird Sie diesbezüglich kontrollieren, informieren und Ihnen stets zur Seite stehen.

**Blutentnahme**

Mit der Ausnahme der Blutentnahmen und Laktatmessungen beinhaltet diese Studie kein weiteres invasives Verfahren.

Falls Sie krank sind oder sich nicht wohl fühlen, informieren Sie bitte das Studienpersonal.

**Ihr persönlicher Nutzen bei Studienteilnahme**

- kostenfreie, umfangreiche sportmedizinische Untersuchungen mit Bestimmung der körperlichen Leistungsfähigkeit und der Laborparameter
- individuelle Empfehlungen für ein sportliches Training
- kostenfreies gesundheitsorientiertes und strukturiertes Trainingsprogramm
- mutmaßlich Verbesserung Ihrer Vorhofflimmer-Beschwerden
- beitrug zur konzeptionellen Entwicklung der Therapie bei Vorhofflimmern.

Nur durch Ihr Engagement, Ihre ermittelten Körperdaten und Ihre Meinung kann unser wissenschaftliches Projekt gelingen und ein wichtiger Beitrag zur Vorhofflimmerbehandlung geleistet werden!

Wir würden uns freuen, Sie als TeilnehmerIn unserer Studie begrüßen zu dürfen!

Mit freundlichen Grüßen

Studienarzt

Sportwissenschaftlerin

wissenschaftliche Assistenz

---

**Anhang C: Patienteneinverständniserklärung Studie**

„Vorhofflimmern und Sport.“

Name \_\_\_\_\_ Geburtsdatum \_\_\_\_\_

### Probanden- Einverständniserklärung

1. Hiermit erkläre ich mich freiwillig bereit, an der oben genannten Studie teilzunehmen.
2. Mir ist bekannt, dass ich jederzeit meine Zustimmung zur Teilnahme an der Studie widerrufen kann, ohne mich hierfür rechtfertigen zu müssen.
3. Die zuständigen Personen des Instituts für Kreislaufforschung und Sportmedizin der Deutschen Sporthochschule Köln haben mich über Wesen, Bedeutung und Tragweite dieser Studie in verständlicher Form aufgeklärt.
4. Ich habe die Patienteninformation erhalten, gelesen und verstanden.
5. Mir wurde die Möglichkeit eingeräumt, Fragen zur Probandenaufklärung und zu meiner Teilnahme an der Studie zu stellen. Auf meine Fragen habe ich ausreichend Antworten erhalten.
6. Ich bin einverstanden, dass meine Daten – im Rahmen der Studie – gespeichert sowie wissenschaftlich ausgewertet werden. Dies geschieht ohne Angabe von Name und Anschrift meiner Person.

Eine Kopie dieser Einverständniserklärung habe ich erhalten.

-----  
Unterschrift Studienteilnehmerin

-----  
Unterschrift der aufklärenden Person

-----  
Ort, Datum

-----  
Ort, Datum

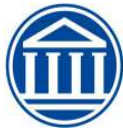

**Deutsche  
Sporthochschule Köln**  
German Sport University Cologne

### **ExAfib-Studie - Datenschutzinformationen**

Das Institut für Kreislaufforschung und Sportmedizin der Deutschen Sporthochschule Köln (nachfolgend bezeichnet als „DSHS“) erhebt von Ihnen personenbezogene Daten zum Zwecke der **sportmedizinischen Untersuchung und Behandlung**. Der Schutz Ihrer personenbezogenen Daten ist für die DSHS dabei ein zentrales Anliegen. Dementsprechend fühlen wir uns den gesetzlichen Vorgaben, insbesondere der europäischen Datenschutz-Grundverordnung (nachfolgend bezeichnet als „DS-GVO“), dem Datenschutzgesetz des Landes Nordrhein-Westfalen und dem Hochschulgesetz des Landes Nordrhein-Westfalen verpflichtet.

Mit diesen Datenschutzbestimmungen informieren wir Sie gemäß Art. 13 und 14 DS-GVO über den Umgang mit Ihren personenbezogenen Daten und Ihre Rechte nach der DS-GVO.

#### **1. Wer ist für die Datenverarbeitung verantwortlich?**

Verantwortliche Stelle im Sinne der Datenschutzgesetze ist die

Deutsche Sporthochschule Köln,  
Institut für Kreislaufforschung und Sportmedizin  
Am Sportpark Müngersdorf 6  
50933 Köln  
Deutschland  
Tel.: 0221 4982 5270  
E-Mail: [sportmedizin@dshs-koeln.de](mailto:sportmedizin@dshs-koeln.de)

#### **2. Wie kann der Datenschutzbeauftragte kontaktiert werden?**

Der Datenschutzbeauftragte der verantwortlichen Stelle kann wie folgt kontaktiert werden:

Deutsche Sporthochschule Köln  
Der Datenschutzbeauftragte  
- persönlich -  
Am Sportpark Müngersdorf 6  
50933 Köln  
Deutschland  
E-Mail: [datenschutz@dshs-koeln.de](mailto:datenschutz@dshs-koeln.de)

#### **3. Für welche Zwecke und auf welchen Rechtsgrundlagen werden Ihre Daten verarbeitet?**

Die DSHS erhebt von Ihnen im Rahmen der sportmedizinischen Betreuung folgende personenbezogene Daten: Geburtsdatum, Adresse und weitere Kontaktdaten, Krankengeschichte inkl. akuter Beschwerden, Sport- und Leistungshistorie, sowie weitere sportmedizinisch relevante Informationen je nach Fall und spezifischer Fragestellung: Hierzu können zählen Körpermaße und -zusammensetzung, Leistungsparameter (z.B. Ergometriedaten,

Laktatwerte, etc.), Funktionsparameter diverser Organe (z.B. EKG, Lungenfunktionsprüfung, Herzleistung, etc.), Laborwerte (ausmaß je nach Untersuchungsziel variabel).

Rechtsgrundlage der Datenverarbeitung ist Art. 6 Abs. 1 S. 1 a) und Art. 9 Abs. 2 a) DS-GVO.

Um die sportmedizinische Athleten- und Patientenbetreuung stets zu optimieren werden die erhobenen Daten anonymisiert für Forschungsprojekte verwendet. Eine Veröffentlichung Ihrer personenbezogenen Daten erfolgt grundsätzlich nur in anonymisierter Form, also ohne die Möglichkeit einen Rückschluss auf Ihre Person zu ziehen.

#### **4. An wen werden Ihre Daten weitergeleitet?**

Eine Weitergabe Ihrer persönlichen Daten an Dritte erfolgt ohne Ihre ausdrückliche Einwilligung nicht. Auch die Übermittlung an auskunftsberechtigte staatliche Institution und Behörden erfolgt nur im Rahmen der gesetzlichen Auskunftspflichten oder wenn wir durch eine gerichtliche Entscheidung zur Auskunft verpflichtet werden. Sofern wir zur Zweckerfüllung auf vertraglich verbundene Fremdunternehmen und externe Dienstleister angewiesen sind, wurden diese von uns sorgfältig ausgewählt und beauftragt, sind an unsere Weisungen gebunden und werden regelmäßig kontrolliert.

Im Rahmen der sportmedizinischen Untersuchung werden entnommene Blutproben inklusive personenbezogener Daten an externe Labore übergeben, um Werte zu erheben, die die hausinterne Diagnostikmöglichkeit überschreiten.

#### **5. Wie lange werden Ihre Daten gespeichert?**

Ihre Daten werden 10 Jahre in den Archiven des Institutes für Kreislaufforschung und Sportmedizin aufbewahrt. Nach Ablauf der Aufbewahrungsfrist werden Ihre Daten gelöscht/vernichtet.

Ihre Daten werden anonymisiert, sobald dies nach dem Forschungs- oder Statistikzweck möglich ist.

#### **6. Welche Rechte haben Sie?**

Aufgrund der Erhebung und Verarbeitung Ihrer personenbezogenen Daten haben Sie uns gegenüber folgende Rechte hinsichtlich der Sie betreffenden personenbezogenen Daten:

- Recht auf Auskunft nach Art. 15 DS-GVO,
- Recht auf Berichtigung Ihrer Daten nach Art. 16 DS-GVO oder Löschung Ihrer Daten nach Art. 17 DS-GVO,
- Recht auf Einschränkung der Verarbeitung nach Art. 18 DS-GVO,
- Recht auf Datenübertragbarkeit nach Art. 20 DS-GVO.
- Sofern die Datenverarbeitung auf Grundlage einer Einwilligung (Art. 6 Abs. 1 S. 1 a) oder Art. 9 Abs. 2 a) DS-GVO) erfolgt, haben Sie gemäß Art. 7 Abs. 3 DS-GVO das Recht auf jederzeitigen Widerruf Ihrer Einwilligung, ohne dass die Rechtmäßigkeit der aufgrund der Einwilligung bis zum Widerruf erfolgten Verarbeitung berührt wird.

- Soweit Sie der Ansicht sind, dass Ihre vorstehend aufgeführten Rechte im Sinne des geltenden Datenschutzrechts verletzt sind, haben Sie zudem nach Art. 77 DS-GVO das Recht sich bei der zuständigen Aufsichtsbehörde zu beschweren. Hierzu können Sie sich an

die Landesbeauftragte für Datenschutz und Informationsfreiheit Nordrhein-Westfalen,  
Kavalleriestraße 2-4, 40213 Düsseldorf  
Postfach 20 04 44, 40102 Düsseldorf,  
Telefon: 0211 38424 – 0  
E-Mail unter [poststelle@ldi.nrw.de](mailto:poststelle@ldi.nrw.de)

wenden. Weitere Informationen erhalten Sie unter <http://www.ldi.nrw.de>.

Sofern die Datenverarbeitung gemäß Art. 6 Abs. 1 S. 1 e) DS-GVO erfolgt, haben Sie nach Art. 21 DS-GVO das Recht, dieser Verarbeitung jederzeit unter der oben unter Ziff. 1 genannten Adresse zu widersprechen, sofern sich aus Ihrer besonderen Situation Gründe ergeben, die dieser Datenverarbeitung entgegenstehen. Die Datenverarbeitung wird dann beendet, es sei denn, die DSHS kann zwingende schutzwürdige Gründe für die Verarbeitung nachweisen, die Ihre Interessen, Rechte und Freiheiten überwiegen, oder sofern die Verarbeitung der Geltendmachung, Ausübung oder Verteidigung von Rechtsansprüchen dient.

Ich habe die Datenschutzhinweise gelesen, zur Kenntnis genommen und bin einverstanden.

-----

Vor- und Nachname

-----

Ort, Datum, Unterschrift

**ExAfib-Studie - Einwilligungserklärung zur Datenverarbeitung:**

Im Rahmen der sportmedizinischen Untersuchung werden folgende personenbezogene Daten von Ihnen erhoben und verarbeitet: Vor- und Zuname, Geburtsdatum, Adresse und weitere Kontaktdaten, Krankengeschichte inkl. akuter Beschwerden, Sport- und Leistungshistorie, sowie weitere sportmedizinisch relevante Informationen je nach Fall und spezifischer Fragestellung: Hierzu können zählen Körpermaße und -zusammensetzung, Leistungsparameter (z.B. Ergometriedaten, Laktatwerte, etc.), Funktionsparameter diverser Organe (z.B. EKG, Lungenfunktionsprüfung, Herzleistung, etc.), Laborwerte (ausmaß je nach Untersuchungsziel variabel).

Hierfür benötigen wir Ihre Einwilligungserklärung. Rechtsgrundlage der Datenverarbeitung ist Art. 6 Abs. 1 S. 1 a) sowie Art. 9 Abs. 2 a) DS-GVO. Ihre Einwilligungserklärung ist freiwillig, jedoch ist eine Studienteilnahme ohne Einwilligung nicht möglich. Sie können Ihre Einwilligungserklärung jederzeit mit Wirkung für die Zukunft widerrufen. Ihre personenbezogenen Daten werden dann unverzüglich gelöscht, soweit die weitere Speicherung nicht auf Grundlage einer gesetzlichen Vorschrift gestattet und geboten ist. Durch den Widerruf der Einwilligungserklärung wird die Rechtmäßigkeit der aufgrund der Einwilligungserklärung bis zum Widerruf erfolgten Datenverarbeitung nicht berührt.

Ich willige in die Verarbeitung meiner personenbezogenen Daten ein.

-----  
Vor- und Nachname

-----  
Ort, Datum, Unterschrift

„Vorhofflimmern und Sport.“

**Name der/des Patienten/in** \_\_\_\_\_

An der Deutschen Sporthochschule Köln wird im Institut für Kreislaufforschung und Sportmedizin eine Studie vorbereitet, welche den Einfluss von körperlicher Belastung in Form von Ausdauertraining, Intervalltraining und Krafttraining auf Patienten mit Vorhofflimmern untersucht. Hintergrund der Studie ist die Beobachtung, dass Vorhofflimmern in der Bevölkerung immer mehr zunimmt und dass sportliche Interventionen bisher positive Effekte auf diverse Parameter aufzeigen konnten. Die gewonnenen Ergebnisse aus der Studie sollen mit dazu beitragen, neue Konzepte für die Therapie des Vorhofflimmerns zu entwickeln.



## Studieninhalte

Im Rahmen der Studie wird ein 12-wöchiges Trainingsprogramm á 2 Trainingseinheiten pro Woche durchgeführt. Vor und nach dem 12-Wochen-Zeitraum werden medizinische Untersuchungen und Testungen zu Ausdauer und Kraft durchgeführt.

## Untersuchung

An der Studie können Menschen im Alter zwischen 50 und 80 Jahren mit anfallsartigem (paroxysmale) Vorhofflimmern teilnehmen.

Alle Untersuchungen finden in der Deutschen Sporthochschule Köln, Institut für Kreislaufforschung und Sportmedizin, statt (NawiMedi, 1. Stock).

Im Rahmen einer Voruntersuchung werden Sie über den Inhalt, den Ablauf und mögliche Risiken der Studie aufgeklärt. Es werden Ihnen formale Dokumente ausgeteilt, Sie füllen einen Fragebogen aus und unterschreiben die Einverständniserklärung. Des Weiteren vereinbaren wir nach Einschluss in die Studie die weiteren Termine für die nächsten Untersuchungen.

**Hauptuntersuchung** (Durchführung einmal vor der Trainingsintervention und einmal nach der Trainingsintervention)

Es werden folgende Untersuchungen durchgeführt:

- Anthropometrische Daten:
  - Körpergewicht, Körpergröße, Körperzusammensetzung, Bauchumfang
- Ruhe-EKG
- Ruhe Blutdruckmessung
- Arteriographie
- Herzfrequenzvariabilitätsmessung
- Blutabnahme (nüchtern)
- Echokardiografie
- Ultraschall der Beinmuskulatur
- Spiroergometrie mit Laktatmessung auf dem Fahrradergometer
- 24-Stunden-Blutdruckmessung und -EKG

## Training

Das Training findet in den Räumlichkeiten der Deutschen Sporthochschule statt (NawiMedi, 1. Stock, Trainingsraum).

Die TeilnehmerInnen werden in vier Gruppen zufällig eingeteilt (**randomisiert**).

Gruppe A: submaximales Krafttraining

Gruppe B: moderates Ausdauertraining

Gruppe C: intensives Ausdauertraining (HIIT)

Gruppe D: Kontrollgruppe

Die Trainingseinheiten werden unter Anleitung und kontinuierlicher Betreuung durchgeführt.

Das Gruppentraining findet 2x wöchentlich à 60 Minuten statt.

Die Trainingseinheiten sind auf Ihre individuelle Leistungsfähigkeit zugeschnitten. Die individuelle Belastungsintensität wird aus dem Fahrradbelastungstest und durch standardisierte Krafttestungen am Gerät ermittelt.

Nach dem Ende der Trainingsintervention und absolvierter Untersuchung ist die empirische Phase der Studie beendet.

Es fallen bei Teilnahme an der Studie für Sie keinerlei Kosten an. Die Anfahrt zu den Untersuchungen und Trainingseinheiten müssen Sie jedoch selber tragen. Es werden keine Reisekosten erstattet.

### **Mögliche gesundheitliche Risiken**

Zur Vermeidung eines erhöhten Risikos bei einer Teilnahme an körperlichen Belastungstests und sportlichem Training, werden mögliche gesundheitliche Risiken mittels Fragebogen, Untersuchung und eines Belastungstests des Herz-Kreislauf-Systems unter ärztlicher Aufsicht ausgeschlossen.

Die TeilnehmerInnen werden während des Trainings von ausgebildeten Fachkräften betreut.

Trotzdem können natürlich bei intensiver oder ungewohnter Belastung Beschwerden auftreten (z.B. Muskelkater durch Krafttraining, Bluthochdruck durch Belastung, etc.). Die Wahrscheinlichkeit für Komplikationen ist sehr gering. Das erfahrene Team aus Sportwissenschaftlern und Sportmedizinern wird Sie diesbezüglich kontrollieren und informieren und stets zur Seite stehen.

### **Blutentnahme**

Mit der Ausnahme der Blutentnahmen und Laktatmessungen beinhaltet diese Studie kein weiteres invasives Verfahren.

Falls Sie krank sind oder sich nicht wohl fühlen, informieren Sie das Studienpersonal.

### Ihr persönlicher Nutzen bei Studienteilnahme

- Kostenfreie, umfangreiche Untersuchungen mit Bestimmung der körperlichen Leistungsfähigkeit und der Laborparameter
- Individuelle Empfehlungen für ein sportliches Training
- Kostenfreies gesundheitsorientiertes und strukturiertes Trainingsprogramm
- Bewusster Beitrag für Ihre Gesundheit
- Beitrag zur konzeptionellen Entwicklung der Therapie bei Vorhofflimmern.

Aus diesen Gründen werden Sie auf jeden Fall von der Studienteilnahme profitieren.

Nur durch Ihr Engagement, Ihre ermittelten Körperdaten und Ihre Meinung kann unser wissenschaftliches Projekt gelingen.

Wir würden uns freuen, Sie als Teilnehmerin an unserer Studie begrüßen zu dürfen.

Mit freundlichen Grüßen

Studienarzt

Sportwissenschaftlerin

wissenschaftliche

Assistentin

---

### Anhang C: Patienteneinverständniserklärung Studie

*„Vorhofflimmern und Sport.“*

Name der/des Patienten/in \_\_\_\_\_

#### Probanden- Einverständniserklärung

1. Hiermit erkläre ich mich freiwillig bereit, an der oben genannten Studie teilzunehmen.

2. Mir ist bekannt, dass ich jederzeit meine Zustimmung zur Teilnahme an der Studie widerrufen kann, ohne mich hierfür rechtfertigen zu müssen.
3. Die zuständigen Personen des Instituts für Kreislaufforschung und Sportmedizin der Deutschen Sporthochschule Köln haben mich über Wesen, Bedeutung und Tragweite dieser Studie in verständlicher Form aufgeklärt.
4. Ich habe die Patienteninformation erhalten, gelesen und verstanden.
5. Mir wurde die Möglichkeit eingeräumt, Fragen zur Probandenaufklärung und zu meiner Teilnahme an der Studie zu stellen. Auf meine Fragen habe ich ausreichend Antworten erhalten.
6. Ich bin einverstanden, dass meine Daten – im Rahmen der Studie – gespeichert sowie wissenschaftlich ausgewertet werden. Dies geschieht ohne Angabe von Name und Anschrift meiner Person.
7. Die Bestimmungen des Bundesdatenschutzgesetzes sowie des SGB (Sozial-Gesetzbuches) 5 und SGB 10 werden erfüllt.

Eine Kopie dieser Einverständniserklärung habe ich erhalten

-----  
Unterschrift Studienteilnehmerin

-----  
Unterschrift der aufklärenden Person

-----  
Ort, Datum

-----  
Ort, Datum

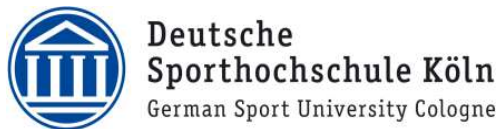

### **Datenschutzinformationen**

Das Institut für Kreislaufforschung und Sportmedizin der Deutschen Sporthochschule Köln (nachfolgend bezeichnet als „DSHS“) erhebt von Ihnen personenbezogene Daten zum Zwecke der **sportmedizinischen Untersuchung und Behandlung**. Der Schutz Ihrer personenbezogenen Daten ist für die DSHS dabei ein zentrales Anliegen. Dementsprechend fühlen wir uns den gesetzlichen Vorgaben, insbesondere der europäischen Datenschutz-Grundverordnung (nachfolgend bezeichnet als „DS-GVO“), dem Datenschutzgesetz des Landes Nordrhein-Westfalen und dem Hochschulgesetz des Landes Nordrhein-Westfalen verpflichtet.

Mit diesen Datenschutzbestimmungen informieren wir Sie gemäß Art. 13 und 14 DS-GVO über den Umgang mit Ihren personenbezogenen Daten und Ihre Rechte nach der DS-GVO.

#### **1. Wer ist für die Datenverarbeitung verantwortlich?**

Verantwortliche Stelle im Sinne der Datenschutzgesetze ist die

Deutsche Sporthochschule Köln,  
Institut für Kreislaufforschung und Sportmedizin  
Am Sportpark Müngersdorf 6  
50933 Köln  
Deutschland  
Tel.: 0221 4982 5270  
E-Mail: [sportmedizin@dshs-koeln.de](mailto:sportmedizin@dshs-koeln.de)

#### **2. Wie kann der Datenschutzbeauftragte kontaktiert werden?**

Der Datenschutzbeauftragte der verantwortlichen Stelle kann wie folgt kontaktiert werden:

Deutsche Sporthochschule Köln  
Der Datenschutzbeauftragte  
- persönlich -  
Am Sportpark Müngersdorf 6  
50933 Köln  
Deutschland  
E-Mail: [datenschutz@dshs-koeln.de](mailto:datenschutz@dshs-koeln.de)

#### **3. Für welche Zwecke und auf welchen Rechtsgrundlagen werden Ihre Daten verarbeitet?**

Die DSHS erhebt von Ihnen im Rahmen der sportmedizinischen Betreuung folgende personenbezogene Daten: Geburtsdatum, Adresse und weitere Kontaktdaten, Krankengeschichte inkl. akuter Beschwerden, Sport- und Leistungshistorie, sowie weitere sportmedizinisch relevante Informationen je nach Fall und spezifischer Fragestellung: Hierzu können zählen Körpermaße und -zusammensetzung, Leistungsparameter (z.B. Ergometriedaten, Laktatwerte, etc.), Funktionsparameter diverser Organe (z.B. EKG, Lungenfunktionsprüfung, Herzleistung, etc.), Laborwerte (ausmaß je nach Untersuchungsziel variabel).

Rechtsgrundlage der Datenverarbeitung ist Art. 6 Abs. 1 S. 1 a) und Art. 9 Abs. 2 a) DS-GVO.

Um die sportmedizinische Athleten- und Patientenbetreuung stets zu optimieren werden die erhobenen Daten anonymisiert für Forschungsprojekte verwendet. Eine Veröffentlichung Ihrer personenbezogenen Daten erfolgt grundsätzlich nur in anonymisierter Form, also ohne die Möglichkeit einen Rückschluss auf Ihre Person zu ziehen.

#### **4. An wen werden Ihre Daten weitergeleitet?**

Eine Weitergabe Ihrer persönlichen Daten an Dritte erfolgt ohne Ihre ausdrückliche Einwilligung nicht. Auch die Übermittlung an auskunftsberechtigte staatliche Institution und Behörden erfolgt nur im Rahmen der gesetzlichen Auskunftspflichten oder wenn wir durch eine gerichtliche Entscheidung zur Auskunft verpflichtet werden. Sofern wir zur Zweckerfüllung auf vertraglich verbundene Fremdunternehmen und externe Dienstleister angewiesen sind, wurden diese von uns sorgfältig ausgewählt und beauftragt, sind an unsere Weisungen gebunden und werden regelmäßig kontrolliert.

Im Rahmen der sportmedizinischen Untersuchung werden entnommene Blutproben inklusive personenbezogener Daten an externe Labore übergeben, um Werte zu erheben, die die hausinterne Diagnostikmöglichkeit überschreiten.

#### **5. Wie lange werden Ihre Daten gespeichert?**

Ihre Daten werden 10 Jahre in den Archiven des Institutes für Kreislaufforschung und Sportmedizin aufbewahrt. Nach Ablauf der Aufbewahrungsfrist werden Ihre Daten gelöscht/vernichtet.

Ihre Daten werden anonymisiert, sobald dies nach dem Forschungs- oder Statistikzweck möglich ist.

#### **6. Welche Rechte haben Sie?**

Aufgrund der Erhebung und Verarbeitung Ihrer personenbezogenen Daten haben Sie uns gegenüber folgende Rechte hinsichtlich der Sie betreffenden personenbezogenen Daten:

- Recht auf Auskunft nach Art. 15 DS-GVO,
- Recht auf Berichtigung Ihrer Daten nach Art. 16 DS-GVO oder Löschung Ihrer Daten nach Art. 17 DS-GVO,
- Recht auf Einschränkung der Verarbeitung nach Art. 18 DS-GVO,
- Recht auf Datenübertragbarkeit nach Art. 20 DS-GVO.
- Sofern die Datenverarbeitung auf Grundlage einer Einwilligung (Art. 6 Abs. 1 S. 1 a) oder Art. 9 Abs. 2 a) DS-GVO) erfolgt, haben Sie gemäß Art. 7 Abs. 3 DS-GVO das Recht auf

jederzeitigen Widerruf Ihrer Einwilligung, ohne dass die Rechtmäßigkeit der aufgrund der Einwilligung bis zum Widerruf erfolgten Verarbeitung berührt wird.

- Soweit Sie der Ansicht sind, dass Ihre vorstehend aufgeführten Rechte im Sinne des geltenden Datenschutzrechts verletzt sind, haben Sie zudem nach Art. 77 DS-GVO das Recht sich bei der zuständigen Aufsichtsbehörde zu beschweren. Hierzu können Sie sich an die Landesbeauftragte für Datenschutz und Informationsfreiheit Nordrhein-Westfalen, Kavalleriestraße 2-4, 40213 Düsseldorf, Postfach 20 04 44, 40102 Düsseldorf, Telefon: 0211 38424 – 0, E-Mail unter [poststelle@ldi.nrw.de](mailto:poststelle@ldi.nrw.de)

wenden. Weitere Informationen erhalten Sie unter <http://www.ldi.nrw.de>.

Sofern die Datenverarbeitung gemäß Art. 6 Abs. 1 S. 1 e) DS-GVO erfolgt, haben Sie nach Art. 21 DS-GVO das Recht, dieser Verarbeitung jederzeit unter der oben unter Ziff. 1 genannten Adresse zu widersprechen, sofern sich aus Ihrer besonderen Situation Gründe ergeben, die dieser Datenverarbeitung entgegenstehen. Die Datenverarbeitung wird dann beendet, es sei denn, die DSHS kann zwingende schutzwürdige Gründe für die Verarbeitung nachweisen, die Ihre Interessen, Rechte und Freiheiten überwiegen, oder sofern die Verarbeitung der Geltendmachung, Ausübung oder Verteidigung von Rechtsansprüchen dient.

Ich habe die Datenschutzzinformation gelesen, zur Kenntnis genommen und bin einverstanden.

-----  
Vor- und Nachname

-----  
Ort, Datum, Unterschrift

**Einwilligungserklärung zur Datenverarbeitung:**

Im Rahmen der sportmedizinischen Untersuchung, ggf. im Sinne einer Sporttauglichkeitsuntersuchung, werden folgende personenbezogene Daten von Ihnen erhoben und verarbeitet: Vor- und Zuname, Geburtsdatum, Adresse und weitere Kontaktdaten, Krankengeschichte inkl. akuter Beschwerden, Sport- und Leistungshistorie, sowie weitere sportmedizinisch relevante Informationen je nach Fall und spezifischer Fragestellung: Hierzu können zählen Körpermaße und -zusammensetzung, Leistungsparameter (z.B. Ergometriedaten, Laktatwerte, etc.), Funktionsparameter diverser Organe (z.B. EKG, Lungenfunktionsprüfung, Herzleistung, etc.), Laborwerte (ausmaß je nach Untersuchungsziel variabel).

Hierfür benötigen wir Ihre Einwilligungserklärung. Rechtsgrundlage der Datenverarbeitung ist Art. 6 Abs. 1 S. 1 a) sowie Art. 9 Abs. 2 a) DS-GVO. Ihre Einwilligungserklärung ist freiwillig, jedoch ist ohne diese eine sportärztliche Beurteilung und Ausstellung einer Sporttauglichkeit nicht möglich, was je nach Regelwerk des jeweiligen Sportverbandes eine regelrechte Teilnahme an Training und Wettkämpfen unmöglich machen könnte und in speziellen Fällen auch eine Einschränkung von Förderung nach sich ziehen kann. Sie können Ihre Einwilligungserklärung jederzeit mit Wirkung für die Zukunft widerrufen. Ihre personenbezogenen Daten werden dann unverzüglich gelöscht, soweit die weitere Speicherung nicht auf Grundlage einer gesetzlichen Vorschrift gestattet und geboten ist. Durch den Widerruf der Einwilligungserklärung wird die Rechtmäßigkeit der aufgrund der Einwilligungserklärung bis zum Widerruf erfolgten Datenverarbeitung nicht berührt.

Ich willige in die Verarbeitung meiner personenbezogenen Daten ein.

-----  
Vor- und Nachname

-----  
Ort, Datum, Unterschrift
